# Supplementary material for: Adenine-based bio-MOFs with high water and acid–base stability for ammonia capture
Source: Royal Society of Chemistry journal article supplement (doi:10.1039/d2ce01092e), 2022-01-01
Supplement: d2ce01092e1.pdf [file d2ce01092e1.pdf]

# Adenine-based bio-MOFs with high water and acid-base stability for ammonia capture

Mingming Ruan,<sup>a</sup> Anqi Li,<sup>a</sup> Yaping Wen,<sup>a</sup> Lian Zhou,<sup>b</sup> Jun Zhang<sup>\*b,c</sup> and Xiaopeng Xuan<sup>\*a</sup>

---

<sup>a</sup> Henan Key Laboratory of Green Chemistry, Collaborative Innovation Center of Henan Province for Green Manufacturing of Fine Chemicals, Key Laboratory of Green Chemical Media and Reactions, Ministry of Education, School of Chemistry and Chemical Engineering, Henan Normal University, Xinxiang 453007, P. R. China.

<sup>b</sup> Key Laboratory of Functional Molecule Design and Interface Process, Anhui Jianzhu University, Hefei 230601, P. R. China.

<sup>c</sup> State Key Laboratory of Plateau Ecology and Agriculture, New Energy Photovoltaic Industry Research Center, Qinghai University, Xining 810016, P. R. China.

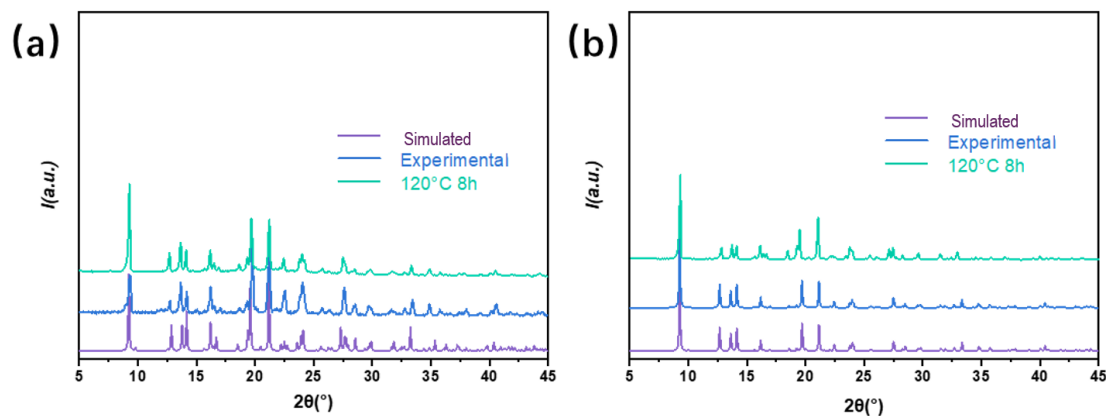

**Fig. S1** PXRD patterns of  $\text{Zn(3-AIN)(AD)•DMF}$  (a) and  $\text{Zn(3-AIN)(AD)•DMA}$  (b).

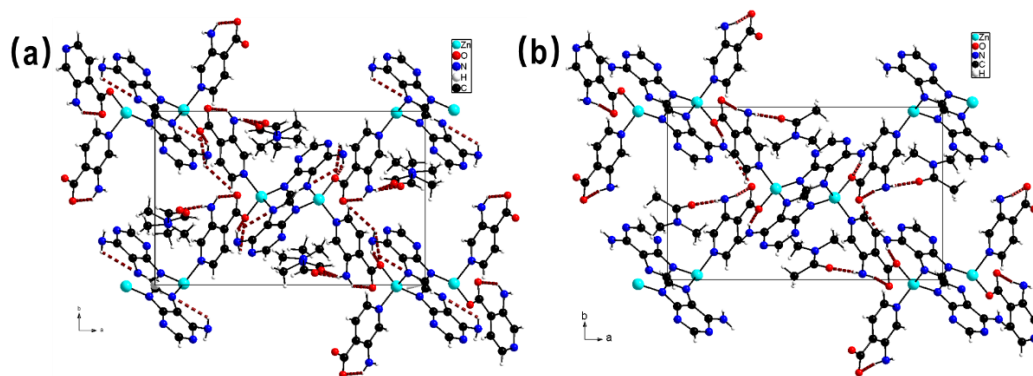

**Fig. S2** N-H...O and N-H...N hydrogen bond networks (dash line) for  $\text{Zn(3-AIN)(AD)•DMF}$  (a) and N-H...O hydrogen bond networks (dash line) for  $\text{Zn(3-AIN)(AD)•DMA}$ .

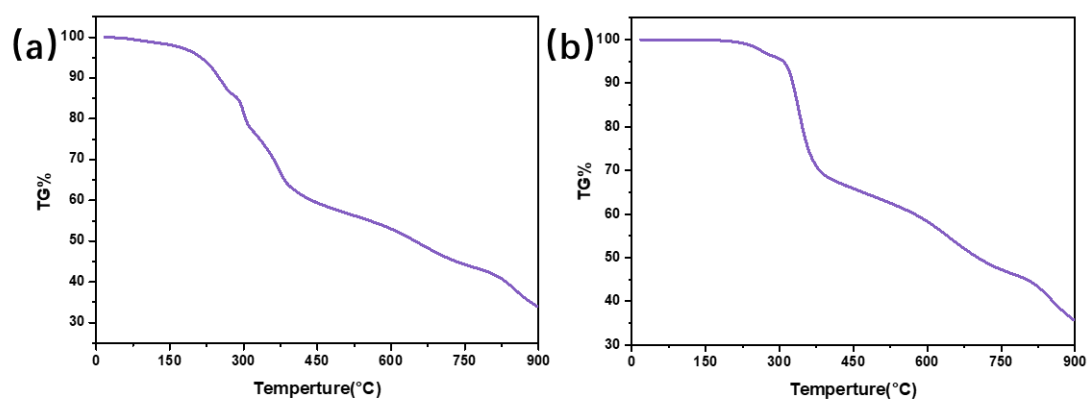

**Fig. S3** TG curves of  $\text{Zn(3-AIN)(AD)•DMF}$  (a) and  $\text{Zn(3-AIN)(AD)•DMA}$  (b).

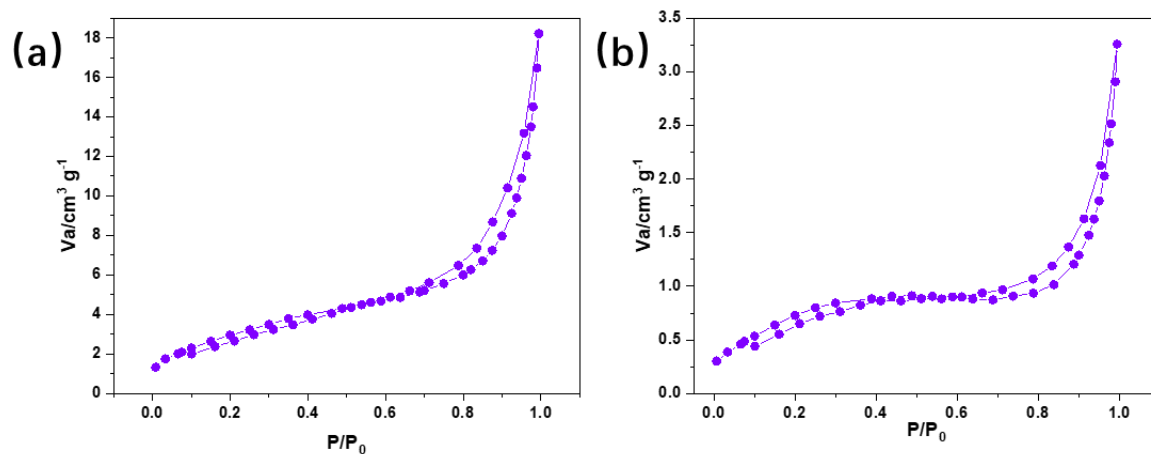

Fig. S4 N<sub>2</sub> adsorption isotherms of Zn(3-AIN)(AD)•DMA (a) and Zn(3-AIN)(AD)•DMF(b)

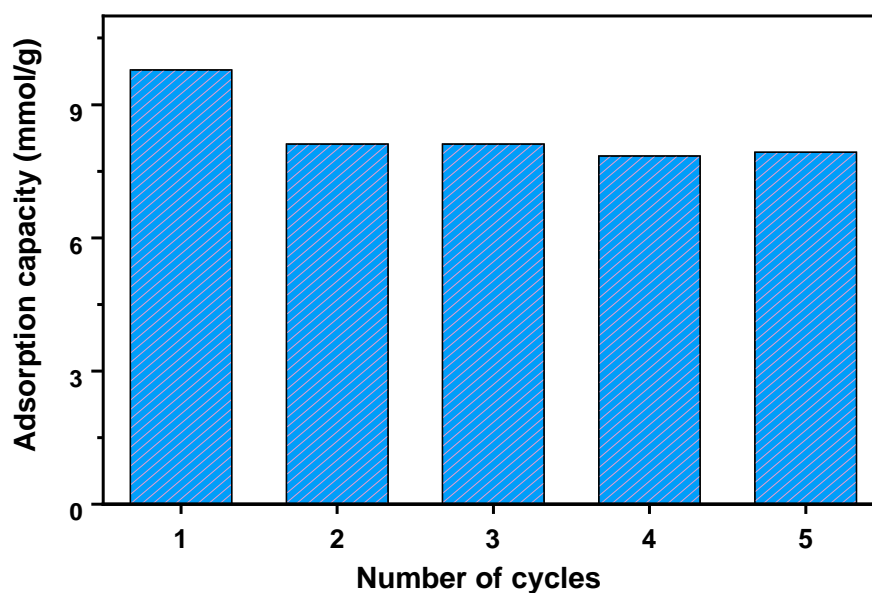

Fig. S5 Comparison of NH<sub>3</sub> uptake of Zn(3-AIN)(AD)•DMA in the five adsorption cycles.

**Table S1 Crystal data and structure refinement for (3-AIN)(AD)•DMA and Zn(3-AIN)(AD)•DMF**

| Identification code                         | <b>(3-AIN)(AD)•DMA</b>                                                                           | <b>Zn(3-AIN)(AD)•DMF</b>                                                                                         |
|---------------------------------------------|--------------------------------------------------------------------------------------------------|------------------------------------------------------------------------------------------------------------------|
| Empirical formula                           | C <sub>11</sub> H <sub>9</sub> N <sub>7</sub> O <sub>2</sub> Zn•C <sub>4</sub> H <sub>9</sub> NO | (C <sub>11</sub> H <sub>9</sub> N <sub>7</sub> O <sub>2</sub> Zn) <sub>2</sub> •C <sub>3</sub> H <sub>7</sub> NO |
| Formula weight                              | 423.74                                                                                           | 746.34                                                                                                           |
| Temperature/K                               | 170.00(10)                                                                                       | 293(2)                                                                                                           |
| Crystal system                              | orthorhombic                                                                                     | orthorhombic                                                                                                     |
| Space group                                 | Pna2 <sub>1</sub>                                                                                | Pna2 <sub>1</sub>                                                                                                |
| a/Å                                         | 18.0312(5)                                                                                       | 17.6657(3)                                                                                                       |
| b/Å                                         | 11.2975(5)                                                                                       | 11.3205(2)                                                                                                       |
| c/Å                                         | 8.6680(3)                                                                                        | 8.8645(2)                                                                                                        |
| α/°                                         | 90                                                                                               | 90                                                                                                               |
| β/°                                         | 90                                                                                               | 90                                                                                                               |
| γ/°                                         | 90                                                                                               | 90                                                                                                               |
| Volume/Å <sup>3</sup>                       | 1765.74(11)                                                                                      | 1772.76(6)                                                                                                       |
| Z                                           | 4                                                                                                | 2                                                                                                                |
| ρ <sub>calc</sub> /cm <sup>3</sup>          | 1.594                                                                                            | 1.398                                                                                                            |
| μ/mm <sup>-1</sup>                          | 2.253                                                                                            | 2.139                                                                                                            |
| F(000)                                      | 872.0                                                                                            | 760.0                                                                                                            |
| Crystal size/mm <sup>3</sup>                | 0.19 × 0.16 × 0.15                                                                               | 0.19 × 0.19 × 0.15                                                                                               |
| Radiation                                   | Cu Kα (λ = 1.54184)                                                                              | Cu Kα (λ = 1.54184)                                                                                              |
| 2θ range for data collection/°              | 9.238 to 143.058                                                                                 | 9.278 to 143.104                                                                                                 |
| Index ranges                                | -22 ≤ h ≤ 21, -13 ≤ k ≤ 13,<br>-5 ≤ l ≤ 10                                                       | -12 ≤ h ≤ 21, -13 ≤ k ≤ 13,<br>-9 ≤ l ≤ 10                                                                       |
| Reflections collected                       | 4578                                                                                             | 5570                                                                                                             |
| Independent reflections                     | 2338 [R <sub>int</sub> = 0.0251,<br>R <sub>sigma</sub> = 0.0317]                                 | 2800 [R <sub>int</sub> = 0.0255,<br>R <sub>sigma</sub> = 0.0364]                                                 |
| Data/restraints/parameters                  | 2338/1/248                                                                                       | 2800/262/282                                                                                                     |
| Goodness-of-fit on F <sup>2</sup>           | 1.121                                                                                            | 1.141                                                                                                            |
| Final R indexes [I >= 2σ (I)]               | R <sub>1</sub> = 0.0381, wR <sub>2</sub> = 0.1110                                                | R <sub>1</sub> = 0.0561, wR <sub>2</sub> = 0.1605                                                                |
| Final R indexes [all data]                  | R <sub>1</sub> = 0.0393, wR <sub>2</sub> = 0.1132                                                | R <sub>1</sub> = 0.0580, wR <sub>2</sub> = 0.1645                                                                |
| Largest diff. peak/hole / e Å <sup>-3</sup> | 0.64/-0.60                                                                                       | 1.03/-0.47                                                                                                       |
| Flack parameter                             | 0.07(6)                                                                                          | -0.02(3)                                                                                                         |

**Table S2. Hydrogen bonds for Zn(3-AIN)(AD)•DMF [Å and °].**

| D-H...A               | d(D-H) | d(H...A) | d(D...A)  | <(DHA) |
|-----------------------|--------|----------|-----------|--------|
| N(2)-H(2A)...O(3)     | 0.86   | 2.13     | 2.97(2)   | 162.6  |
| N(2)-H(2A)...O(4)     | 0.86   | 2.19     | 3.02(2)   | 163.0  |
| N(2)-H(2B)...O(2)     | 0.86   | 2.11     | 2.729(9)  | 128.9  |
| N(6)-H(6A)...O(1)#4   | 0.86   | 2.31     | 3.045(8)  | 143.5  |
| N(6)-H(6A)...N(7)     | 0.86   | 2.77     | 3.128(7)  | 107.0  |
| N(6)-H(6B)...O(2)#5   | 0.86   | 2.97     | 3.263(8)  | 102.3  |
| C(2)-H(2)...O(2)      | 0.93   | 3.09     | 3.474(12) | 106.6  |
| C(2)-H(2)...N(3)#4    | 0.93   | 2.57     | 3.421(9)  | 152.3  |
| C(2)-H(2)...N(9)#4    | 0.93   | 2.98     | 3.429(11) | 111.2  |
| C(8)-H(8)...O(1)      | 0.93   | 2.39     | 2.719(8)  | 100.3  |
| C(9)-H(9)...N(7)#6    | 0.93   | 3.03     | 3.422(8)  | 106.9  |
| C(10)-H(10)...O(3)    | 0.93   | 2.61     | 3.38(3)   | 140.5  |
| C(10)-H(10)...O(4)    | 0.93   | 2.67     | 3.44(3)   | 141.0  |
| C(16)-H(16A)...O(4)#7 | 0.96   | 2.94     | 3.46(4)   | 115.0  |

Symmetry transformations used to generate equivalent atoms:

#1 -x+1/2,y+1/2,z+1/2 #2 -x+1,-y+1,z+1/2 #3 -x+1/2,y-1/2,z-1/2 #4 -x+1,-y+1,z-1/2 #5 x+1/2,-y+3/2,z #6 x-1/2,-y+1/2,z #7 -x,-y+1,z-1/2

**Table S3. Hydrogen bonds for Zn(3-AIN)(AD)•DMA [Å and °]**

| D-H...A               | d(D-H) | d(H...A) | d(D...A)  | <(DHA) |
|-----------------------|--------|----------|-----------|--------|
| N(2)-H(2B)...O(3)     | 0.87   | 2.19     | 3.040(8)  | 165.1  |
| N(6)-H(6A)...O(2)#5   | 0.86   | 2.38     | 3.213(6)  | 162.7  |
| N(6)-H(6B)...O(1)#4   | 0.86   | 2.22     | 3.041(7)  | 160.9  |
| C(2)-H(2)...N(3)#4    | 0.93   | 2.59     | 3.449(9)  | 153.3  |
| C(2)-H(2)...N(9)#4    | 0.93   | 2.94     | 3.378(9)  | 110.1  |
| C(8)-H(8)...O(1)      | 0.93   | 2.39     | 2.713(7)  | 100.2  |
| C(9)-H(9)...N(2)#6    | 0.93   | 2.78     | 3.490(9)  | 134.0  |
| C(9)-H(9)...N(7)#7    | 0.93   | 3.03     | 3.438(7)  | 108.1  |
| C(10)-H(10)...O(3)    | 0.93   | 2.50     | 3.301(8)  | 144.3  |
| C(12)-H(12B)...N(1)#3 | 0.96   | 2.82     | 3.493(11) | 128.2  |
| C(14)-H(14A)...O(2)#3 | 0.96   | 2.70     | 3.452(13) | 135.2  |

Symmetry transformations used to generate equivalent atoms:

#1 -x+3/2,y-1/2,z+1/2 #2 -x+1,-y+1,z+1/2 #3 -x+3/2,y+1/2,z-1/2 #4 -x+1,-y+1,z-1/2 #5 x-1/2,-y+1/2,z #6 -x+3/2,y+1/2,z+1/2 #7 x+1/2,-y+3/2,z

**Table S4 The calculated atom distance (*d*) of the hydrogen bond between NH<sub>3</sub> and interaction site in the activated Zn(3-AIN)(AD)•DMA and adsorption energy (*E*<sub>ads</sub>).**

| Adsorption site                  | Site 1 | Site 2 | Site 3 | Site 4 | Site 5 | Site 6 | Site 7 |
|----------------------------------|--------|--------|--------|--------|--------|--------|--------|
| <i>d</i> (Å)                     | 2.24   | 2.21   | 2.29   | 2.24   | 2.18   | 2.24   | 1.98   |
| <i>E</i> <sub>ads</sub> (kJ/mol) | -656.1 | -508.4 | -653.2 | -685.9 | -581.8 | -617.5 | -585.6 |
